# Supplementary material
Source: MDPI journal article supplement (https://www.mdpi.com/2073-4395/11/2/212)
Supplement: s1 [file s1]

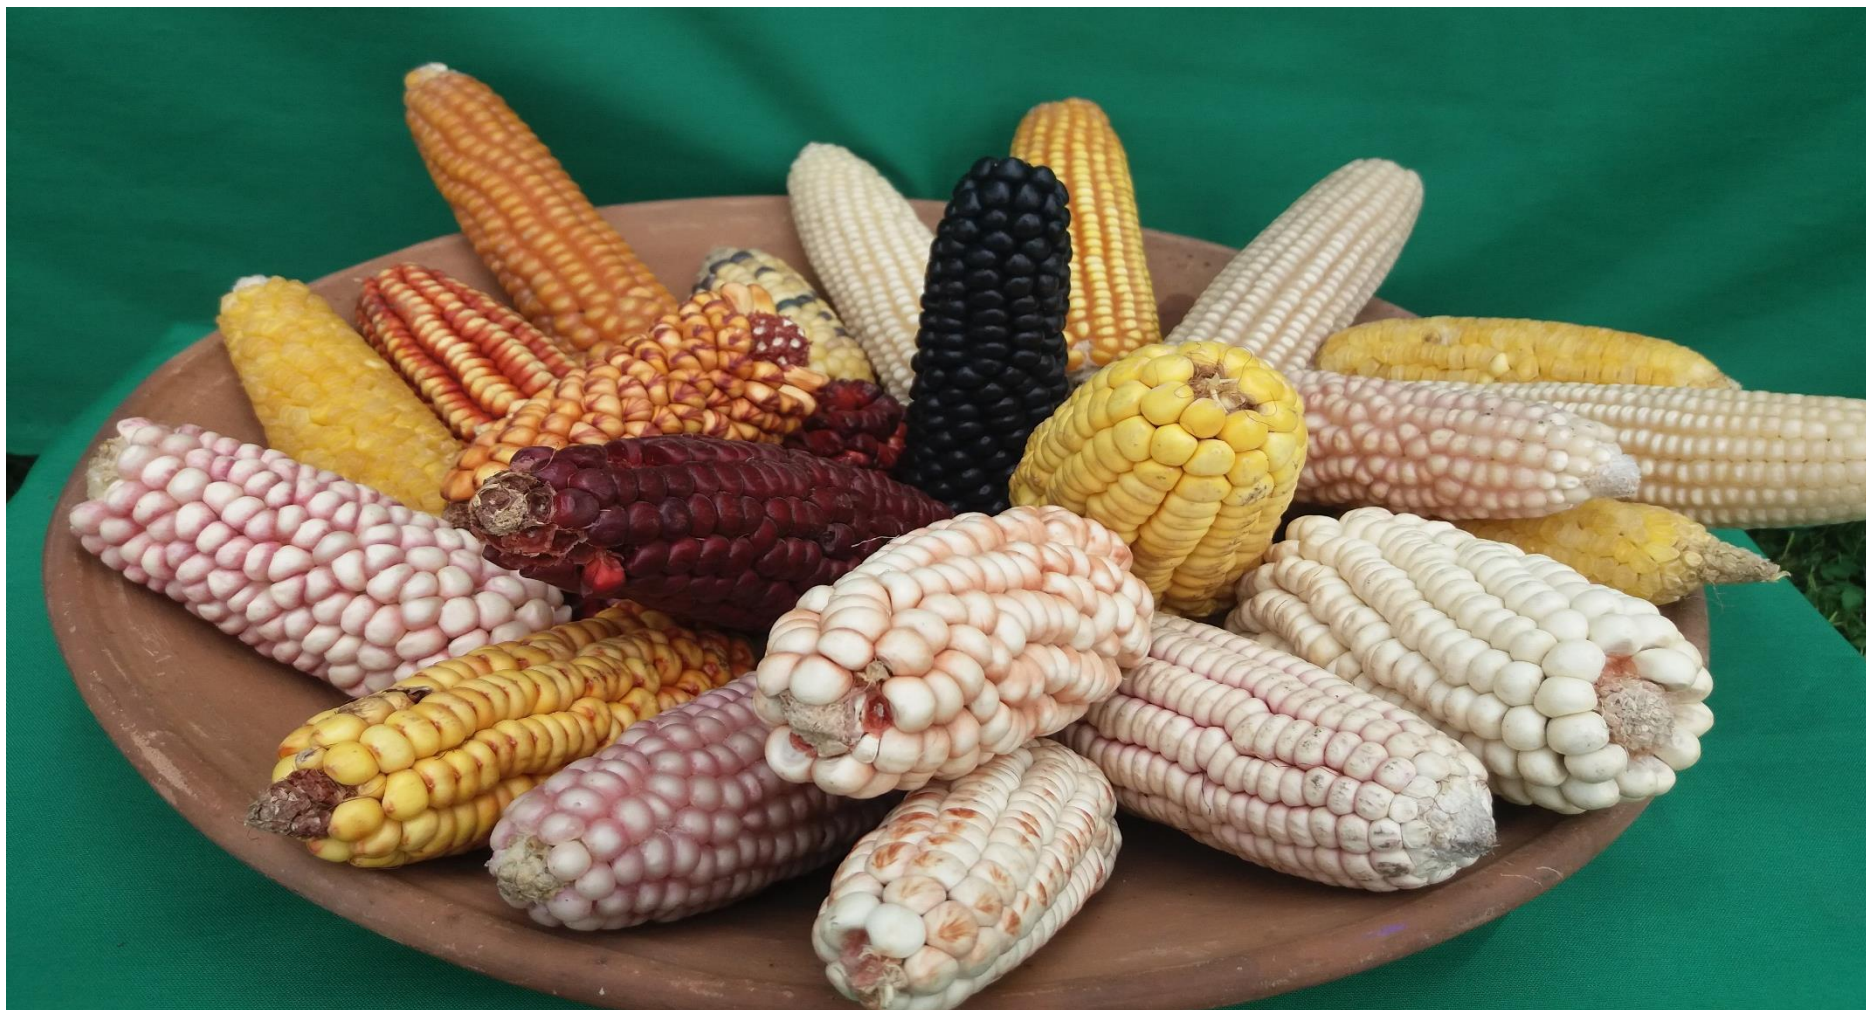

**Figure S1.** Samples of maize landraces found in the highlands of Ecuador, Peru, and Bolivia. It is shown the diversity of shapes, colors, and textures of ears and kernels which represents a great genetic diversity of maize found in the region. Photo credits: J.L. Zambrano.



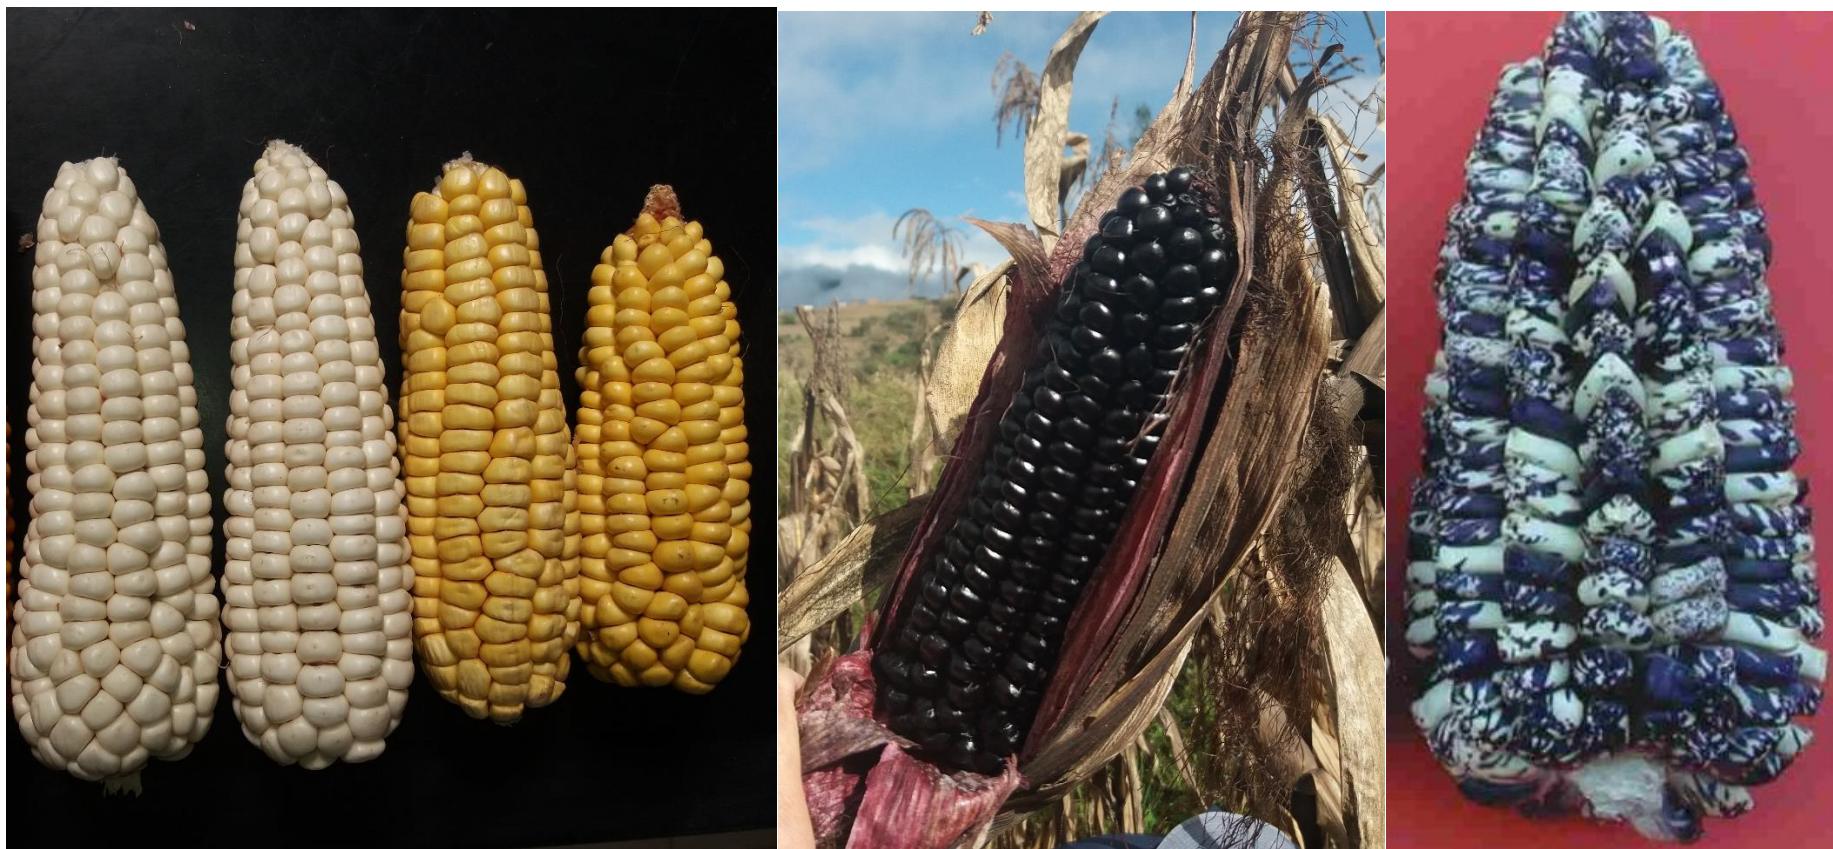

**Figure S2.** Ears of floury open pollinated maize varieties developed in the highlands of Ecuador and Peru. Colors white, yellow, black, and mottled are shown. Photo credits: J. L. Zambrano and INIA [48].
